# Supplementary material
Source: Springer Nature journal article supplement (https://www.springermedizin.de/resource/supplementary/12890_2013_653_MOESM4_ESM.pdf/9505590)

**A**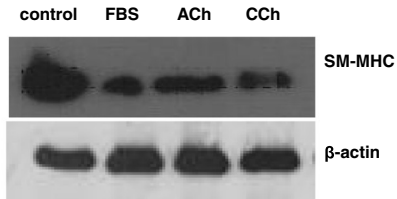**B**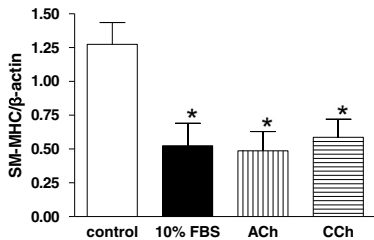**C**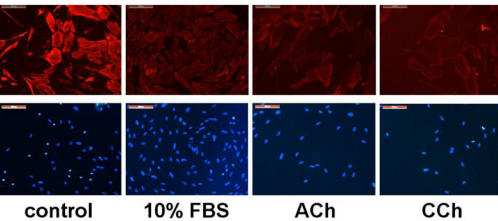**D**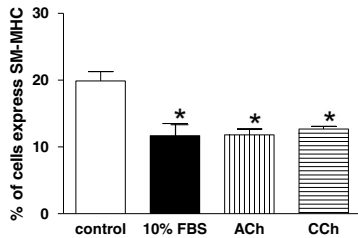

Supplement: MOESM4 [file 9505590]
